# Supplementary material for: MAP17 (PDZK1IP1) and pH2AX are potential predictive biomarkers for rectal cancer treatment efficacy
Source: PubMed Central journal article supplement (PMC6152481; doi:10.18632/oncotarget.26010), 2018-08-31
Supplement: oncotarget-09-32958-s001.pdf [file oncotarget-09-32958-s001.pdf]

## MAP17 (PDZK1IP1) and pH2AX are potential predictive biomarkers for rectal cancer treatment efficacy

### SUPPLEMENTARY MATERIALS

**Supplementary Table 1: Human tumor cohort used in this work**

| <b>Cohort Description and Treatment</b>            |                     |
|----------------------------------------------------|---------------------|
| N                                                  | 135                 |
| Gender                                             |                     |
| Women                                              | 43                  |
| Men                                                | 92                  |
| Age                                                | Median 68 years old |
| Tumor localization                                 |                     |
| Low rectum (3–5 cm from the anal verge) anal)      | 54                  |
| Medium rectum (6–9 cm)                             | 45                  |
| High rectum (10–15 cm)                             | 34                  |
| Non recorded in medical history                    | 2                   |
| Histology and tumoral grade (pre-treatment biopsy) |                     |
| Adenocarcinoma GI                                  | 28                  |
| Adenocarcinoma GII                                 | 67                  |
| Adenocarcinoma GIII                                | 5                   |
| Non recorded in medical history                    | 35                  |
| Pre-treatment stage (TNM)                          |                     |
| I                                                  | 1                   |
| IIA                                                | 23                  |
| IIB                                                | 3                   |
| IIC                                                | 10                  |
| IIIA                                               | 7                   |
| IIIB                                               | 67                  |
| IIIC                                               | 22                  |
| IV                                                 | 2                   |
| Surgery                                            |                     |
| Low anterior resection                             | 89                  |
| Abdominoperineal resection                         | 41                  |
| Other procedures                                   | 5                   |
| Tumor recurrence                                   |                     |
| No events                                          | 101                 |
| Local relapse                                      | 11                  |
| Hepatic relapse                                    | 7                   |
| Lung relapse                                       | 7                   |
| Local and hepatic relapse                          | 2                   |
| Local and lung relapse                             | 3                   |
| Local and peritoneal relapse                       | 1                   |
| Distant relapse in other localizations             | 3                   |

**Supplementary Table 2: Mutational analysis of the CRC lines used in this study. The mutational status was obtained from COSMID database and confirmed by our own mutational analysis**

| <b>Cell line</b> | <b>Kras mutation</b> | <b>Braf V600E</b> | <b>PIK3CA mutation</b> |
|------------------|----------------------|-------------------|------------------------|
| COLO 205         | Wild type            | Mutated           | G914R                  |
| HT29             | Wild type            | Mutated           | P449T                  |
| HCT116           | G13D                 | Wild Type         | H1047R                 |
| LS180            | G12D                 | Wild type         | H1047R                 |
| LOVO             | G13D                 | Wild type         | ND                     |
| T84              | G13D                 | Wild type         | E542K; H1047R          |
| SW480            | G12V                 | Wild type         | ND                     |
| SW48             | Wild type            | Wild type         | G914R                  |
